# Supplementary material for: Can land degradation drive differences in the C exchange of twosimilar semiarid ecosystems?
Source: Copernicus journal article supplement (doi:10.5194/bg-2017-77), 2017-03-21
Supplement: Supplementary file 1 [file bg-2017-77-supplement.pdf]

**Table S1: Results of the two-sided Wilcoxon summed rank test used to assess differences between meteorological variables measured at each experimental site over the all periods. Medians of the absolute (Diff) and standardized differences (Diff<sub>st</sub>) between the samples (Amoladeras minus Balsa Blanca), p-values and number of observations (n) are detailed.**

| Variables                                           | All periods |                    |           |        |
|-----------------------------------------------------|-------------|--------------------|-----------|--------|
|                                                     | Diff        | Diff <sub>st</sub> | p-value   | n      |
| PPFD ( $\mu\text{mol m}^{-2} \text{s}^{-1}$ )       | 0.4701      | 0.0009             | 0         | 205751 |
| Net radiation ( $\text{W m}^{-2}$ )                 | -8.8620     | -0.0457            | 0         | 197924 |
| T <sub>air</sub> (°C)                               | 0.1928      | 0.0310             | 6.42E-10  | 182240 |
| VPD (hPa)                                           | 0.5358      | 0.0783             | 4.38E-104 | 166918 |
| RH (%)                                              | -3.1947     | -0.1636            | 6.39E-244 | 197649 |
| u* ( $\text{m s}^{-1}$ )                            | -0.0016     | -0.0054            | 0.1214    | 166346 |
| WS ( $\text{m s}^{-1}$ )                            | 0.3621      | 0.1628             | 0         | 166359 |
| WS <sub>max</sub> ( $\text{m s}^{-1}$ )             | 0.4327      | 0.1001             | 5.53E-132 | 165458 |
| Pressure (hPa)                                      | 19.0061     | 1.6999             | 0         | 166359 |
| Precipitation (mm)                                  | -0.0001     | -1.95E-05          | 0.0003    | 204892 |
| CO <sub>2, 0.05m</sub> (ppm)                        | -93.8644    | -0.4027            | 0         | 46340  |
| CO <sub>2, 1.50m</sub> (ppm)                        | 888.9239    | 1.1196             | 0         | 50133  |
| T <sub>0.05m</sub> (°C)                             | 0.9215      | 0.0927             | 5.51E-21  | 46337  |
| T <sub>1.50m</sub> (°C)                             | 0.5780      | 0.1476             | 1.43E-51  | 50137  |
| VWC <sub>0.05m</sub> ( $\text{m}^3 \text{m}^{-3}$ ) | 0.0372      | 0.8265             | 0         | 52353  |
| VWC <sub>1.50m</sub> ( $\text{m}^3 \text{m}^{-3}$ ) | -0.0123     | -0.8385            | 0         | 53865  |

**Table S2: Results of the two-sided Wilcoxon summed rank test used to assess differences between meteorological variables measured at each experimental site from May to September. Medians of the absolute (Diff) and standardized differences (Diff and Diff<sub>st</sub>) between the samples (Amoladeras minus Balsa Blanca), p-values and number of observations (n) are detailed.**

| Variables                                           | May - September |                    |           |       |
|-----------------------------------------------------|-----------------|--------------------|-----------|-------|
|                                                     | Diff            | Diff <sub>st</sub> | p-value   | n     |
| PPFD ( $\mu\text{mol m}^{-2} \text{s}^{-1}$ )       | 0.5230          | 0.0009             | 8.11E-147 | 84491 |
| Net radiation ( $\text{W m}^{-2}$ )                 | -10.9546        | -0.0476            | 4.78E-167 | 81019 |
| T <sub>air</sub> (°C)                               | 0.8378          | 0.1935             | 1.53E-145 | 77866 |
| VPD (hPa)                                           | 1.1136          | 0.1370             | 4.50E-90  | 71474 |
| RH (%)                                              | -2.0229         | -0.1031            | 1.21E-38  | 80950 |
| u* ( $\text{m s}^{-1}$ )                            | -0.0186         | -0.0563            | 8.47E-31  | 71194 |
| WS ( $\text{m s}^{-1}$ )                            | 0.1720          | 0.0793             | 1.84E-31  | 71195 |
| WS <sub>max</sub> ( $\text{m s}^{-1}$ )             | 0.0498          | 0.0124             | 0.0749    | 70635 |
| Pressure (hPa)                                      | 18.6707         | 1.8696             | 0         | 71195 |
| Precipitation (mm)                                  | 0.0000          | -4.84E-05          | 4.29E-05  | 83860 |
| CO <sub>2, 0.05m</sub> (ppm)                        | -89.2404        | -0.6578            | 9.99E-207 | 21413 |
| CO <sub>2, 1.50m</sub> (ppm)                        | 1109.1440       | 1.3517             | 0         | 24347 |
| T <sub>0.05m</sub> (°C)                             | -0.8057         | -0.1160            | 3.04E-16  | 21410 |
| T <sub>1.50m</sub> (°C)                             | -0.1570         | -0.0591            | 3.13E-07  | 24350 |
| VWC <sub>0.05m</sub> ( $\text{m}^3 \text{m}^{-3}$ ) | 0.0286          | 1.2724             | 0         | 25231 |
| VWC <sub>1.50m</sub> ( $\text{m}^3 \text{m}^{-3}$ ) | 0.0011          | 0.0674             | 3.51E-18  | 24570 |

**Table S3: Results of the two-sided Wilcoxon summed rank test used to assess differences between meteorological variables measured at each experimental site from May to September during daytime. Medians of the absolute (Diff) and standardized differences (Diff<sub>st</sub>) between the samples (Amoladeras minus Balsa Blanca), p-values and number of observations (n) are detailed.**

| Variables                                           | May – September Daytime |                    |          |       |
|-----------------------------------------------------|-------------------------|--------------------|----------|-------|
|                                                     | Diff                    | Diff <sub>st</sub> | p-value  | n     |
| PPFD ( $\mu\text{mol m}^{-2} \text{s}^{-1}$ )       | 64.3400                 | 0.1378             | 5.62E-42 | 38963 |
| Net radiation ( $\text{W m}^{-2}$ )                 | -21.9460                | -0.1205            | 4.80E-34 | 38963 |
| T <sub>air</sub> (°C)                               | 0.1939                  | 0.0502             | 1.39E-06 | 37480 |
| VPD (hPa)                                           | -0.7579                 | -0.0938            | 3.87E-20 | 34430 |
| RH (%)                                              | 2.9921                  | 0.1784             | 1.45E-65 | 38935 |
| u* ( $\text{m s}^{-1}$ )                            | -0.0430                 | -0.1340            | 3.76E-87 | 34284 |
| WS ( $\text{m s}^{-1}$ )                            | 0.0356                  | 0.0165             | 0.1341   | 34285 |
| WS <sub>max</sub> ( $\text{m s}^{-1}$ )             | -0.2920                 | -0.0796            | 5.83E-14 | 33994 |
| Pressure (hPa)                                      | 18.4085                 | 1.8633             | 0        | 34285 |
| Precipitation (mm)                                  | 0.0000                  | 5.32E-05           | 0.9875   | 38963 |
| CO <sub>2, 0.05m</sub> (ppm)                        | -149.513                | -1.1396            | 0        | 9816  |
| CO <sub>2, 1.50m</sub> (ppm)                        | 1046.358                | 1.3062             | 0        | 11385 |
| T <sub>0.05m</sub> (°C)                             | -1.473                  | -0.2119            | 2.70E-21 | 9813  |
| T <sub>1.50m</sub> (°C)                             | -0.220                  | -0.0834            | 4.75E-07 | 11385 |
| VWC <sub>0.05m</sub> ( $\text{m}^3 \text{m}^{-3}$ ) | 0.028                   | 1.2839             | 0        | 11303 |
| VWC <sub>1.50m</sub> ( $\text{m}^3 \text{m}^{-3}$ ) | 0.001                   | 0.0547             | 1.05E-09 | 11462 |
